# Supplementary material for: Patterned liquid permeation through the TiO2 nanotube array coated Ti mesh by photoelectric cooperation for liquid printing
Source: Royal Society of Chemistry journal article supplement (doi:10.1039/c3ta14388k), 2013-12-02
Supplement: c3ta14388k.pdf [file c3ta14388k.pdf]

## Supporting Information

### Patterned Liquid Permeation through the TiO<sub>2</sub> Nanotube Array Coated Ti Mesh by Photoelectric Cooperation for Liquid Printing

*Zhenyan Guo,<sup>a</sup> Xiaofang Zhang,<sup>c</sup> Xi Zheng,<sup>a</sup> Zhaoyue Liu,<sup>a</sup> Jinhua Cai,<sup>b</sup> Dongliang Tian,<sup>\*a</sup> Wenxian Li,<sup>d</sup> Jin Zhai,<sup>a</sup> Yanlin Song<sup>b</sup> and Lei Jiang<sup>a,b</sup>*

<sup>a</sup>Key Laboratory of Bio-Inspired Smart Interfacial Science and Technology of Ministry of Education, Beijing Key Laboratory of Bio-inspired Energy Materials and Devices, School of Chemistry and Environment, Beihang University, Beijing 100191, P. R. China

<sup>b</sup>Beijing National Laboratory for Molecular Sciences (BNLMS), Key Laboratory of Organic Solids, Institute of Chemistry, Chinese Academy of Sciences, Beijing, 100190, P. R. China

<sup>c</sup>Chinese Academy of Inspection and Quarantine, Beijing, 100123, P. R. China.

<sup>d</sup>Institute for Superconducting and Electronic Materials, University of Wollongong, NSW 2522, Australia

<sup>15</sup> E-mail: tiandl@buaa.edu.cn

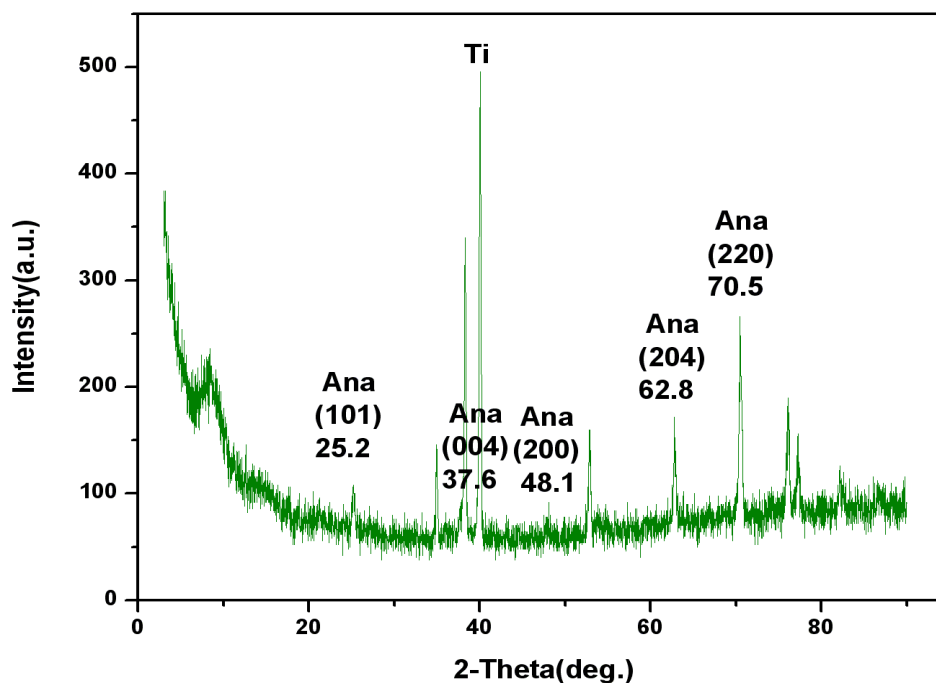

**Figure S1.** X-ray diffraction pattern of annealed TiO<sub>2</sub> nanotubes (500°C 3 h). Characteristic peaks of anatase phase:  $2\theta = 25.2^\circ(101)$ ,  $37.6^\circ(004)$ ,  $48.1^\circ(200)$ ,  $62.8^\circ(204)$ ,  $70.5^\circ(220)$ . The result indicates good anatase phases can be formed after annealing of TiO<sub>2</sub> nanotubes at 500°C for 3h.
